# Supplementary material for: 1H-NMR and LC-MS Based Metabolomics Analysis of Wild and Cultivated Amaranthus spp
Source: MDPI journal article supplement (doi:10.3390/molecules26040795), 2021-02-04
Supplement: s1 [file s1]

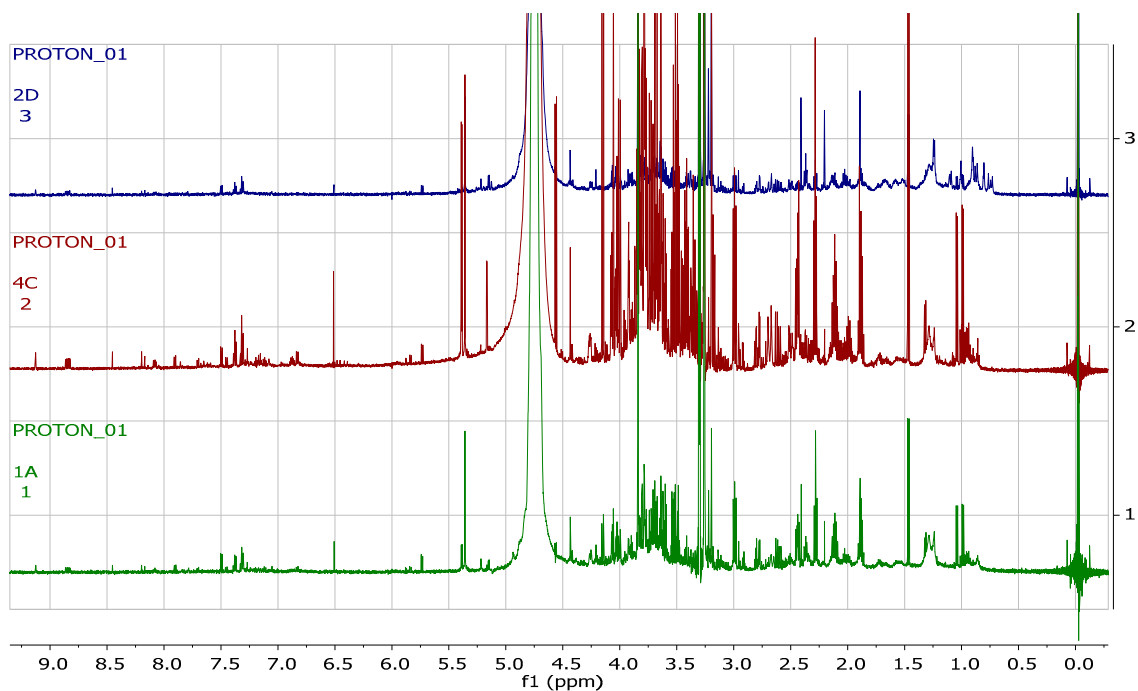

**Figure S1.** The 600 MHz  $^1\text{H}$ -NMR spectra of *A. cruentus* leaf extracts (wild and cultivated). Red = cultivated at Mothong in the open field, blue = collected from the wild (KZN), and green = cultivated at Mothong in the shade net.

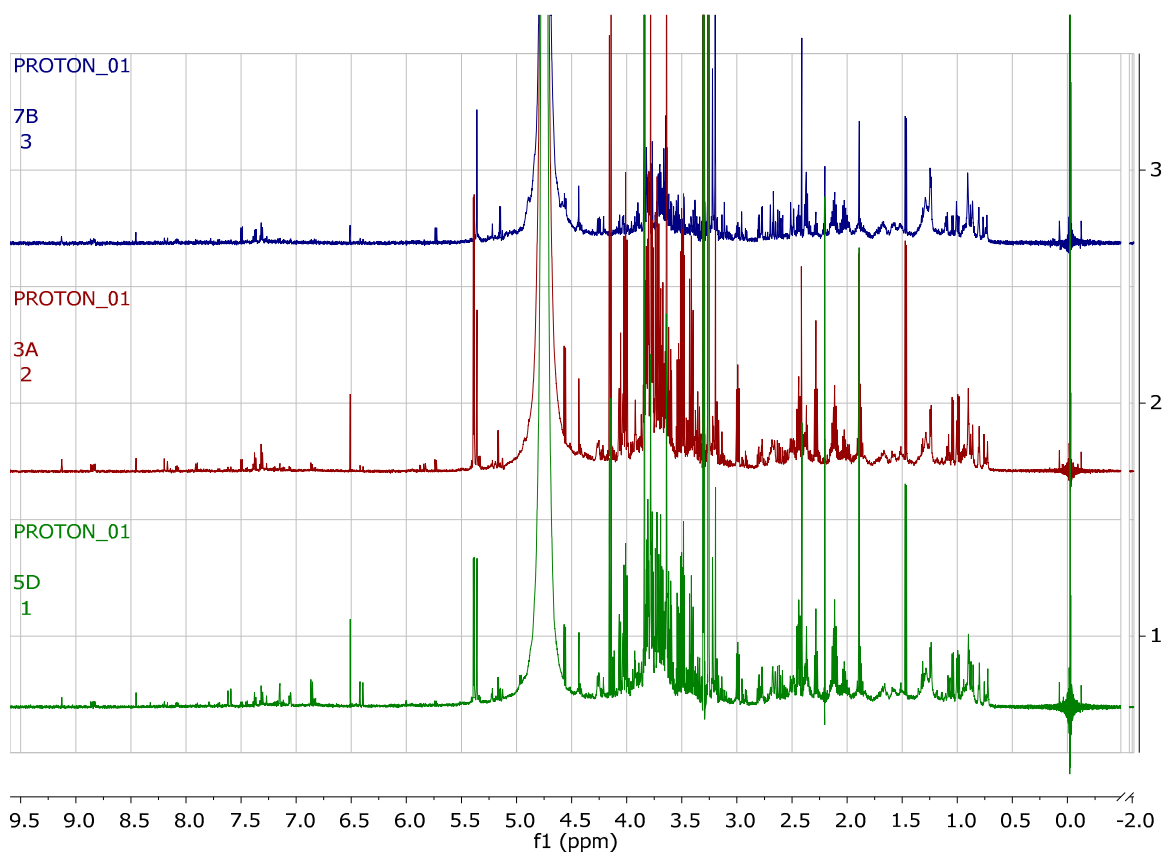

**Figure S2.** The 600 MHz  $^1\text{H}$ -NMR spectra of *A. hybridus* leaf extracts (wild and cultivated). Red = cultivated at Mothong in the open field, blue = collected from the wild (KZN), and green = cultivated at Mothong in the shade net.

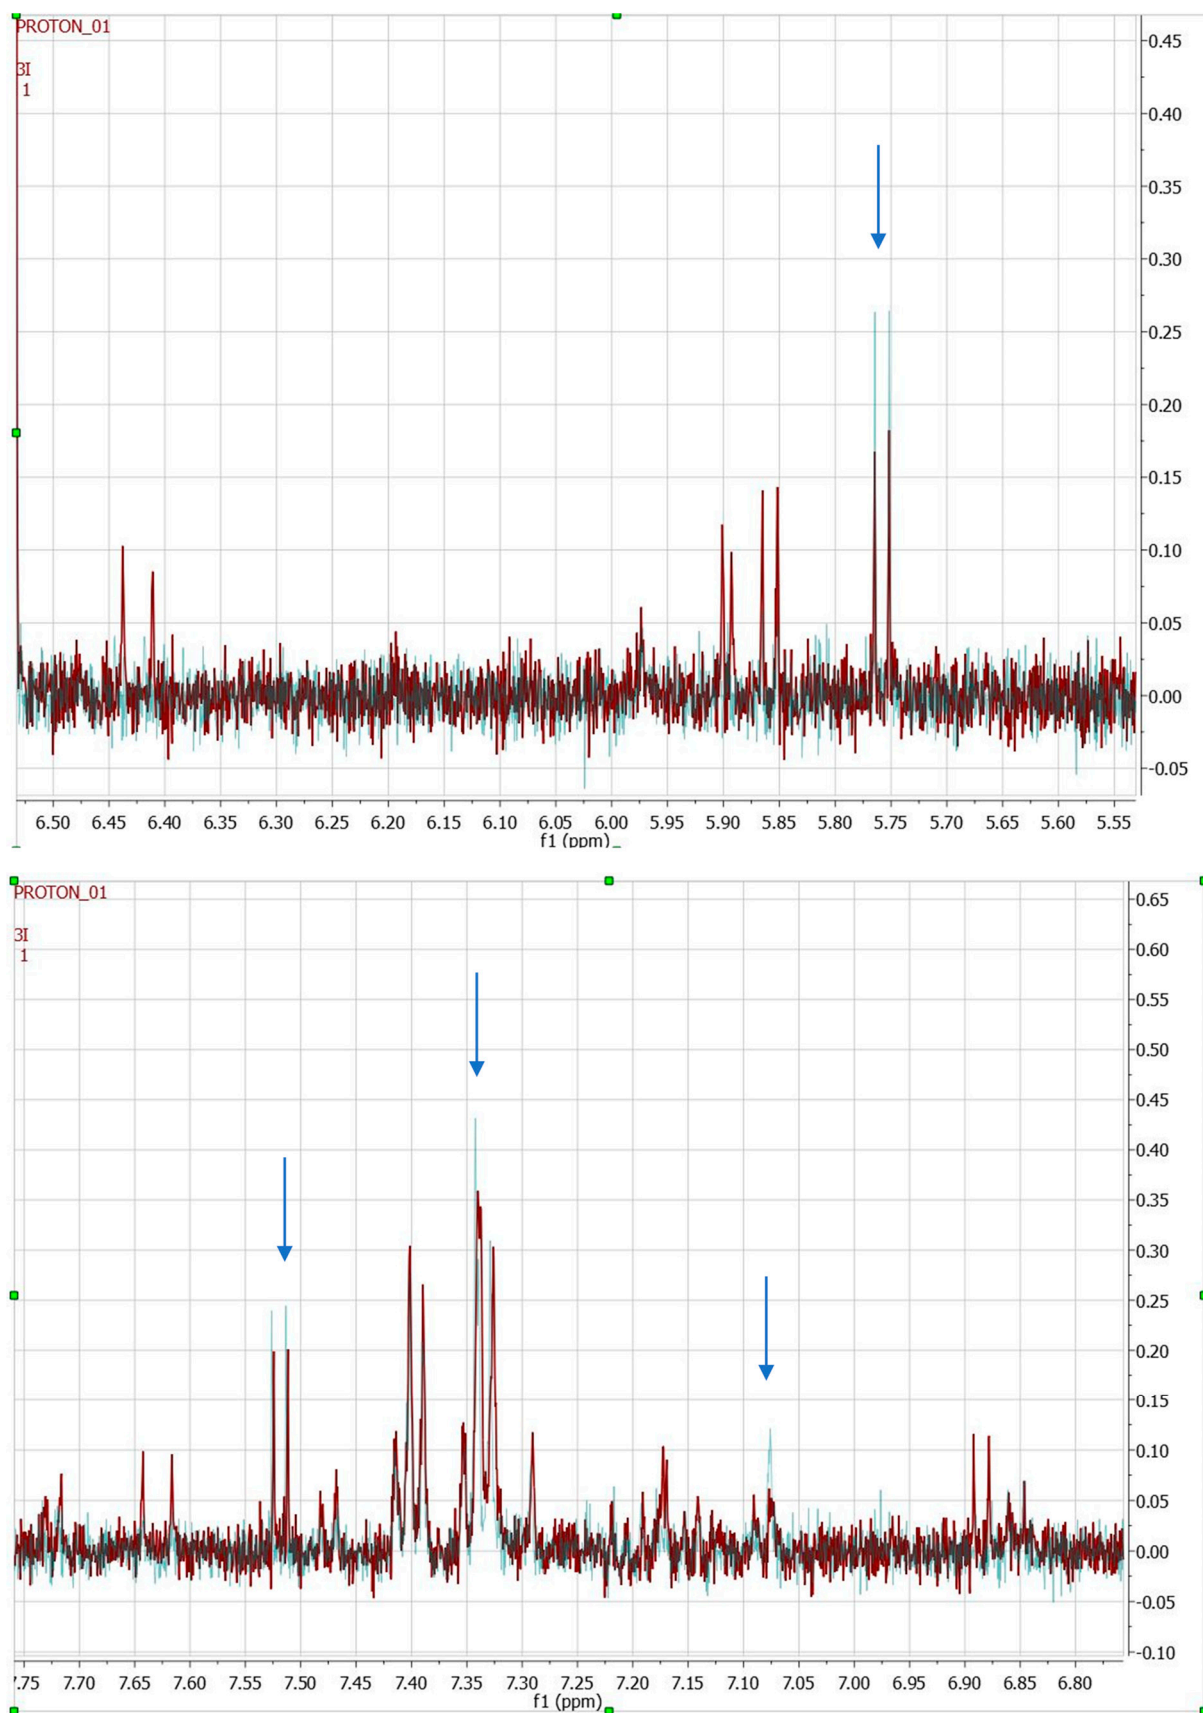

**Figure S3.** Comparison of wild (blue spectrum) and cultivated *A. hybridus* (red spectrum). Peaks at  $\delta$  5.75, 7.07, 7.29, 7.34 and 7.52 are indicated by arrows. Height of the peaks are indicative of the concentration of the compound.

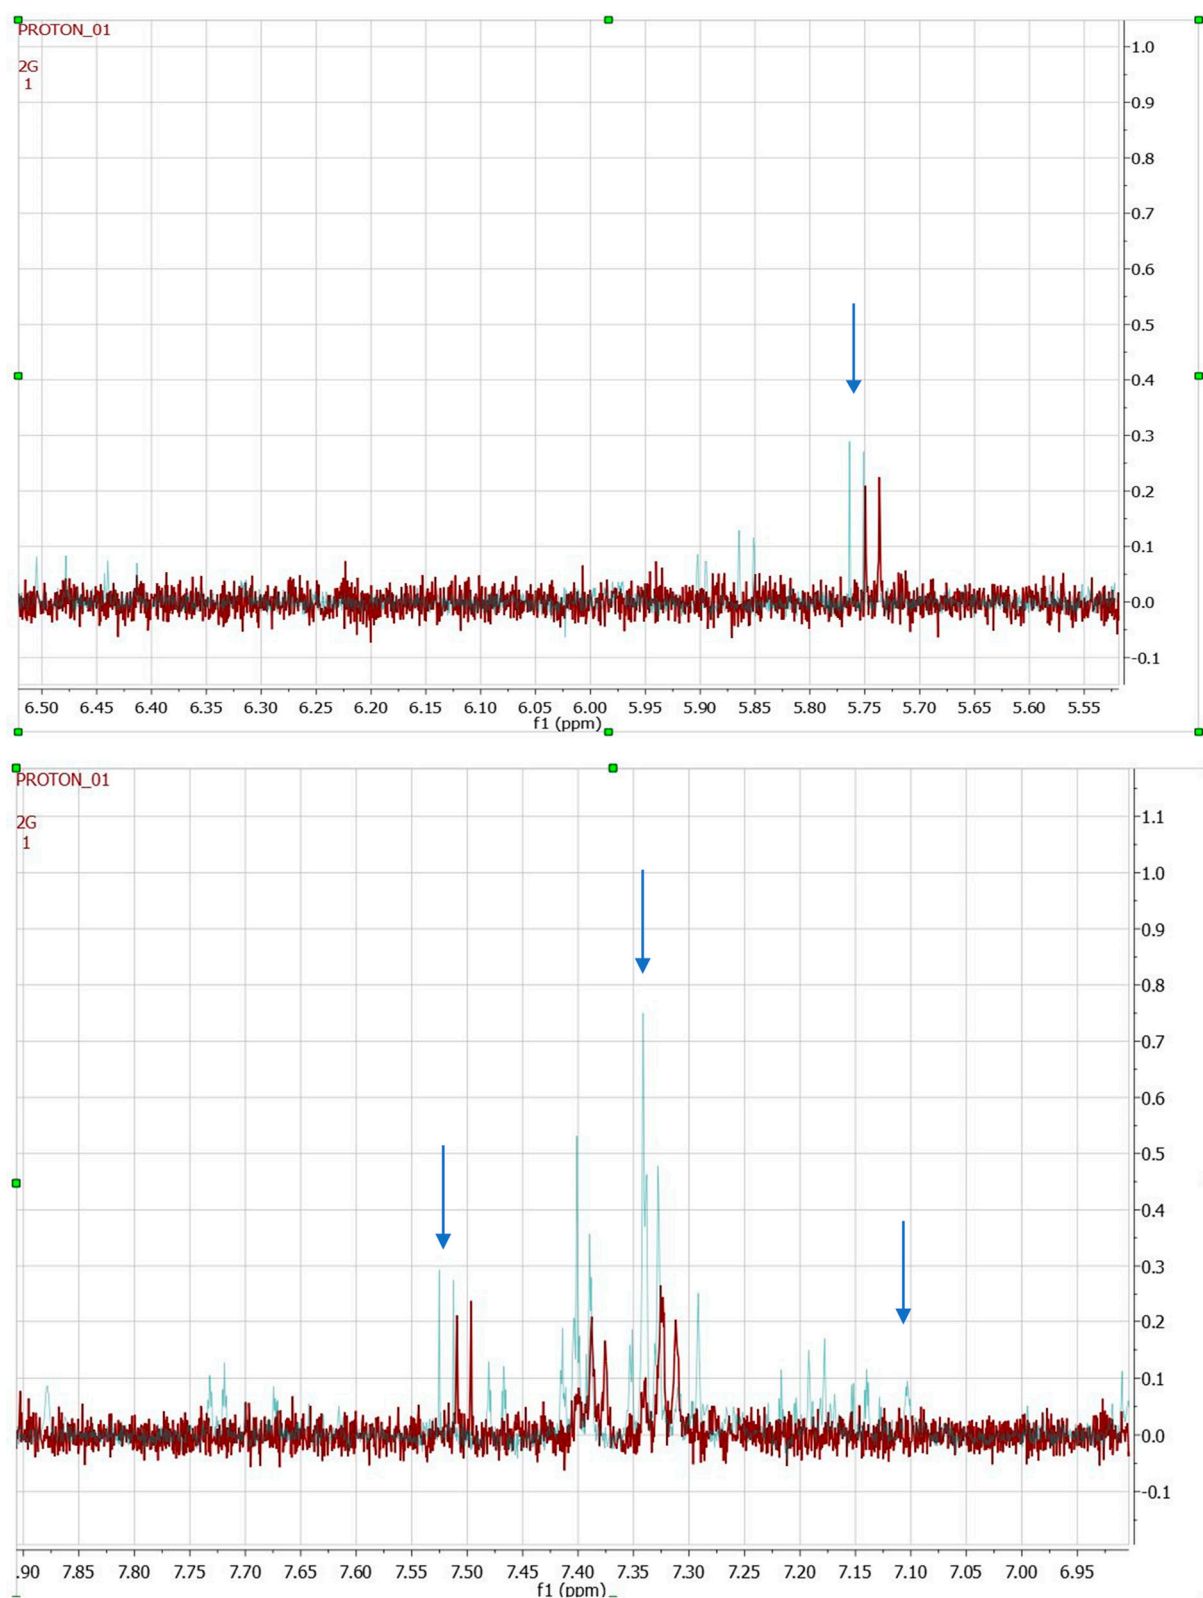

**Figure S4.** Comparison of wild (red spectrum) and cultivated *A. cruentus* (blue spectrum). Peaks at  $\delta$  5.75, 7.10, 7.29, 7.39 and 7.50 are indicated by arrows. Height of the peaks are indicative of the concentration of the compound.
